# Supplementary material for: Understanding Am3+/Cm3+separation with H4TPAEN and its hydrophilic derivatives: a quantum chemical study
Source: Royal Society of Chemistry journal article supplement (doi:10.1039/c7cp08441b), 2018-01-01
Supplement: c7cp08441b1.pdf [file c7cp08441b1.pdf]

## Understanding Am<sup>3+</sup>/Cm<sup>3+</sup> separation with H<sub>4</sub>TPAEN and its hydrophilic derivatives: A quantum chemical study

Pin-Wen Huang,<sup>†a,b</sup> Cong-Zhi Wang,<sup>†a</sup> Qun-Yan Wu,<sup>a</sup> Jian-Hui Lan,<sup>a</sup> Zhi-Fang Chai,<sup>a,c</sup> Wei-Qun Shi<sup>\*a</sup>

<sup>a</sup>Laboratory of Nuclear Energy Chemistry and Key Laboratory for Biomedical Effects of Nanomaterials and Nanosafety, Institute of High Energy Physics, Chinese Academy of Sciences, Beijing 100049, China.

<sup>b</sup>Zhejiang University of Water Resources and Electric Power, Hangzhou 310018, China

<sup>c</sup>School of Radiological and Interdisciplinary Sciences (RAD-X) and Collaborative Innovation Center of Radiation Medicine of Jiangsu Higher Education Institutions, Soochow University, Suzhou 215123, China.

\*Corresponding Author, E-mail: shiwq@ihep.ac.cn

<sup>†</sup>The First two authors contributed equally to this work.

### Electronic Supplementary Information

**Table S1** Changes of Gibbs free energies (kcal/mol) for back extraction Am<sup>3+</sup> and Cm<sup>3+</sup> complexes with three TPAEN type ligands from *n*-dodecane to aqueous solution at the M06-L/6-311+G(2df,p)/RECP level of theory.

| Back reactions                                                                                                                                                                           | $\Delta\hat{G}_{\text{back-ext.}}$ | $\Delta\Delta\hat{G}_{\text{back-ext.}}^b$ |
|------------------------------------------------------------------------------------------------------------------------------------------------------------------------------------------|------------------------------------|--------------------------------------------|
| $\text{An}(\text{TMDGA})_3(\text{NO}_3)_{3,\text{org}} + \text{H}_2\text{L}_a^{2-} \rightarrow [\text{AnL}_a]_{\text{aq}}^- + 3\text{NO}_3^- + 2\text{H}^+ + 3\text{TMDGA}_{\text{org}}$ | -37.864/-41.065                    | -3.201                                     |
| $\text{An}(\text{TMDGA})_3(\text{NO}_3)_{3,\text{org}} + \text{H}_2\text{L}_b^{2-} \rightarrow [\text{AnL}_b]_{\text{aq}}^- + 3\text{NO}_3^- + 2\text{H}^+ + 3\text{TMDGA}_{\text{org}}$ | -28.452/-30.522                    | -2.071                                     |
| $\text{An}(\text{TMDGA})_3(\text{NO}_3)_{3,\text{org}} + \text{H}_2\text{L}_c^{2-} \rightarrow [\text{AnL}_c]_{\text{aq}}^- + 3\text{NO}_3^- + 2\text{H}^+ + 3\text{TMDGA}_{\text{org}}$ | -32.907/-33.095                    | -0.188                                     |
| $\text{An}(\text{TMDGA})_3(\text{NO}_3)_{3,\text{org}} + \text{H}_3\text{L}_a^- \rightarrow [\text{AnL}_a]_{\text{aq}}^- + 3\text{NO}_3^- + 3\text{H}^+ + 3\text{TMDGA}_{\text{org}}$    | -23.055/-26.255                    | -3.201                                     |
| $\text{An}(\text{TMDGA})_3(\text{NO}_3)_{3,\text{org}} + \text{H}_3\text{L}_b^- \rightarrow [\text{AnL}_b]_{\text{aq}}^- + 3\text{NO}_3^- + 3\text{H}^+ + 3\text{TMDGA}_{\text{org}}$    | -23.620/-25.691                    | -2.071                                     |
| $\text{An}(\text{TMDGA})_3(\text{NO}_3)_{3,\text{org}} + \text{H}_3\text{L}_c^- \rightarrow [\text{AnL}_c]_{\text{aq}}^- + 3\text{NO}_3^- + 3\text{H}^+ + 3\text{TMDGA}_{\text{org}}$    | -24.561/-24.749                    | -0.188                                     |
| $\text{An}(\text{TMDGA})_3(\text{NO}_3)_{3,\text{org}} + \text{H}_4\text{L}_a \rightarrow [\text{AnL}_a]_{\text{aq}}^- + 3\text{NO}_3^- + 4\text{H}^+ + 3\text{TMDGA}_{\text{org}}$      | -6.991/-10.191                     | -3.201                                     |
| $\text{An}(\text{TMDGA})_3(\text{NO}_3)_{3,\text{org}} + \text{H}_4\text{L}_b \rightarrow [\text{AnL}_b]_{\text{aq}}^- + 3\text{NO}_3^- + 4\text{H}^+ + 3\text{TMDGA}_{\text{org}}$      | -10.254/-12.325                    | -2.071                                     |
| $\text{An}(\text{TMDGA})_3(\text{NO}_3)_{3,\text{org}} + \text{H}_4\text{L}_c \rightarrow [\text{AnL}_c]_{\text{aq}}^- + 3\text{NO}_3^- + 4\text{H}^+ + 3\text{TMDGA}_{\text{org}}$      | -10.128/-10.317                    | -0.188                                     |

<sup>a</sup>.../... represents results with An=Cm and Am, respectively.

[21] M. J. Frisch, G. W. Trucks, H. B. Schlegel, G. E. Scuseria, M. A. Robb, J. R. Cheeseman, G. Scalmani, V. Barone, B. Mennucci, G. A. Petersson, H. Nakatsuji, M. Caricato, X. Li, H. P. Hratchian, A. F. Izmaylov, J. Bloino, G. Zheng, J. L. Sonnenberg, M. Hada, M. Ehara, K. Toyota, R. Fukuda, J. Hasegawa, M. Ishida, T. Nakajima, Y. Honda, O. Kitao, H. Nakai, T. Vreven, J. A. Montgomery, Jr., J. E. Peralta, F. Ogliaro, M. Bearpark, J. J. Heyd, E. Brothers, K. N. Kudin, V. N. Staroverov, T. Keith, R. Kobayashi, J. Normand, K. Raghavachari, A. Rendell, J. C. Burant, S. S. Iyengar, J. Tomasi, M. Cossi, N. Rega, J. M. Millam, M. Klene, J. E. Knox, J. B. Cross, V. Bakken, C. Adamo, J. Jaramillo, R. Gomperts, R. E. Stratmann, O. Yazyev, A. J. Austin, R. Cammi, C. Pomelli, J. W. Ochterski, R. L. Martin, K. Morokuma, V. G. Zakrzewski, G. A. Voth, P. Salvador, J. J. Dannenberg, S. Dapprich, A. D. Daniels, O. Farkas, J. B. Foresman, J. V. Ortiz, J. Cioslowski, and D. J. Fox, *Gaussian 09, Revision D.01*, Gaussian, Inc., Wallingford CT, 2013
